# Supplementary material
Source: publisher figshare collection journal article supplement (https://tandf.figshare.com/articles/dataset/_/11310854)
Supplement: Supplementary file 1 [file 2]

## Appendix 1: Syntaxonomic scheme

***QUERCETEA ILICIS*** Br.-Bl. in Br.-Bl., Roussine & Nègre 1952

**Pistacio lentisci-Rhamnetalia alaterni** Rivas-Martínez 1975

***Oleo sylvestris-Ceratonion siliquae*** Br.-Bl. ex Guinochet & Drouineau 1944

*Ruto chalepensis-Oleetum sylvestris* ass. nova

- *oleetosum sylvestris* subass. nova
- *cercidetosum siliquastri* subass. nova
- *celtidetosum australis* subass. nova
- *euphorbietosum bivonae* subass. nova
- *rhamnetosum oleoidis* subass. nova
- *periplocetosum angustifoliae* subass. nova

*Chamaeropo humilis-Oleetum sylvestris* ass. nova

- *acanthetosum mollis* subass. nova
- *ephedretosum fragilis* subass. nova

**Quercetalia ilicis** Br.-Bl. ex Molinier 1934

***Erico arboreae-Quercion ilicis*** Brullo, Di Martino & Marcenò 1977

*Calicotomo infestae-Oleetum sylvestris* ass. nova

- *typicum* subass. nova
- *asplenietosum obovatae* subass. nova

## Appendix 2: Other syntaxa quoted in the text

*Ammophiletea* Br.-Bl. et R. Tx. 1943; *Avenulo cincinnatae-Ampelodesmion mauritanici* Minissale 1995; *Ampelodesmo mauritanici-Quercetum ilicis* Gianguzzi, Cuttonaro, Cusimano & Romano 2016; *Asparago acutifolii-Oleetum sylvestris* Bacchetta, Bagella, Biondi, Farris, Filigheddu & Mossa 2003; *Asparago albi-Oleetum sylvestris*, Bacchetta, Bagella, Biondi, Farris, Filigheddu & Mossa 2003; *Asplenietea trichomanis* (Br.-Bl. in Meier & Br.-Bl. 1934) Oberdorfer 1977; *Cakiletea maritimae* Tüxen & Preising in Tüxen 1950; *Calystegio silvaticae-Arundinetum donacis* Brullo, Scelsi & Spampinato 2001; *Cisto eriocephali-Ericion multiflorae* Biondi 2000; *Cisto cretici-Pinetum pineae* Brullo, Minissale, Siracusa, Scelsi, Spampinato 1993; *Crithmo maritimi-Limonietea* Br.-Bl. in Br.-Bl., Roussine & Nègre 1952 nom. mut. propos. (art. 45); *Crithmo maritimi-Staticion* Molinier 1934; *Cyclamino repandi-Oleetum sylvestris* Bacchetta, Bagella, Biondi, Farris, Filigheddu & Mossa 2003; *Dianthion rupicolae* Brullo & Marcenò 1979; *Ephedro fragilis-Lycietum europaei* Brullo & Marcenò 1985; *Ephedro fragilis-Pistacietum lentisci* Brullo, Guarino & Ronsisvalle 1998; *Ephedro-Juniperetum macrocarpae* Bartolo, Brullo & Marcenò 1982; *Erico arboreae-Arbutetum unedonis* Molinier 1937; *Erico arboreae-Quercetum virgilianae* Brullo & Marcenò 1985; *Erico-Micromerietum fruticosae* Brullo & Marcenò 1983; *Euphorbietum dendroidis* Guinochet in Guinochet & Drouniew 1944 subass. *euphorbietosum bivonae* Gianguzzi, Ilardi e Raimondo 1996; *Euphorbietum dendroidis* Trinajstić 1973 (1984) subass. *rhamnetosum oleoidis* Brullo & Marcenò 1985; *Fraxino orni-Quercion ilicis* Biondi, Casavecchia & Gigante ex Biondi, Casavecchia & Gigante in Biondi, Allegranza, Casavecchia, Galdenzi, Gigante & Pesaresi 2013; *Genisto aristatae-Quercetum suberis* Brullo 1984; *Cisto salviifolii-Genistetum madoniensis* Marino, Guarino & Bazan 2012;

*Hyparrhenietum hirta-pubescentis* A. & O. Bolòs & Br.-Bl. in A. & O. Bolòs 1950;  
*Juncetea maritimi* Br.-Bl. ex Tüxen & Oberdorfer 1958; *Juniperion turbinatae* Rivas-  
 Martínez 1975 corr. 1987 *Limonietum bocconeii* Barbagallo, Brullo & Guglielmo 1979;  
*Lomelosio creticae-Centauretum ucrae* Brullo & Marcenò 1979; *Lygeo sparti-Stipetea*  
*tenacissimae* Rivas-Martínez 1978 nom. conserv. propos. Rivas-Martínez, Diaz,  
 Fernández-González, Izco, Loidi, Lousa & Penas 2002; *Myrto communis-Oleetum*  
*sylvestris* Bacchetta, Bagella, Biondi, Farris, Filigheddu & Mossa 2003; *Oleo oleaster-*  
*Quercetum virgilianae* Brullo 1984; *Oleo sylvestris-Ceratonion siliquae* Br.-Bl. ex  
 Guinochet & Drouineau 1944; *Oleo-Euphorbietum dendroidis* Trinajstić 1975 *Pegano*  
*harmalae-Salsoletea vermiculatae* Br.-Bl. & O. Bolòs 1958; *Penniseto setacei-*  
*Hyparrhenietum hirtae* Gianguzzi, Ilardi & Raimondo 1996; *Periplocion angustifoliae*  
 Rivas-Martínez 1975; *Periploco angustifoliae-Euphorbietum dendroidis* Brullo, Di  
 Martino & Marcenò 1977; *Periploco angustifoliae-Juniperetum turbinatae* Bartolo,  
 Brullo, Minissale & Spampinato 1988; *Periploco angustifoliae-Juniperetum turbinatae*  
 Bartolo, Brullo, Minissale & Spampinato 1988 subass. *brassicetosum insularis*  
 Gianguzzi 1999; *Phragmito-Magnocaricetea* Klika in Klika et Novák 1941; *Pistacio*  
*lentisci-Oleetum* Paradis, Feral, Passigny-Hernandez, Nicolau & Carles 2014; *Pistacio*  
*lentisci-Quercetum ilicis* Brullo & Marcenò 1985; *Pistacio lentisci-Rhamnetalia*  
*alaterni* Rivas-Martínez 1975; *Pistacio terebinthi-Celtidetum aetnensis* Gianguzzi,  
 Cusimano & Romano 2014; *Populion albae* Tüxen 1931; *Prasio majoris-Oleetum*  
*sylvestris* O. Bolòs 1996; *Pyro amygdaliformis-Calicotometum infestae* Gianguzzi & La  
 Mantia 2007; *Quercetalia ilicis* Br.-Bl. ex Molinier 1934; *Quercetea ilicis* Br.-Bl. in  
 Br.-Bl., Roussine & Nègre 1952; *Rhamno alaterni-Euphorbietum dendroidis* Géhu &  
 Biondi 1997; *Rhamno alaterni-Quercetum ilicis* Brullo & Marcenò 1985; *Rhamno*  
*catharticae-Prunetea spinosae* Rivas Goday & Borja ex Tüxen 1962; *Rhamno oleoidis-*

*Pistacietum lentisci* Minissale, Musumarra & Sciandrello 2006; *Rhamno-Euphorbietum dendroidis* subass. *ramnetosum oleoidis* (Brullo & Marcenò 1985) Gianguzzi, Cuttonaro, Cusimano & Romano 2016; *Salicetum albo-pedicellatae* Brullo et Spampinato 1990; *Spartio juncei-Nerietum oleandri* Brullo & Spampinato 1990 *Stipo-Trachynietea distachyae* Brullo in Brullo, Scelsi & Spampinato 2001; *Thero-Sedetum caerulei* Brullo 1975; *Tuberarietalia guttatae* Br.-Bl. in Br.-Bl., Molinier & Wagner 1940 nom. mut. propos. Rivas- Martínez, Diaz, Fernández-González, Izco, Loidi, Lousa & Penas 2002; *Tuberarietalia guttatae* (Br.-Bl. in Br.-Bl., Roussine & Nègre 1952) Rivas Goday & Rivas-Martínez 1963 nom. mut. propos. Rivas-Martínez, Diaz, Fernández-González, Izco, Loidi, Lousa & Penas 2002.

### Appendix 3: Sporadic species

**Table S1 – *Ruto chalepensis-Oleetum sylvestris* subass. *oleetosum sylvestris* – Rel. 1:** *Ballota hispanica* (L.) Benth. +, *Micromeria graeca* (L.) Rchb. subsp. *graeca* +, *Torilis nodosa* (L.) Gaertn. subsp. *nodosa* +, *Vicia villosa* Roth 1, *Carduus pycnocephalus* L. subsp. *pycnocephalus* 2, *Geranium purpureum* Vill. 2; **Rel. 2:** *Geranium purpureum* Vill. 2, *Carduus pycnocephalus* L. subsp. *pycnocephalus* 2, *Vicia villosa* Roth 1, *Torilis nodosa* (L.) Gaertn. subsp. *nodosa* +, *Micromeria graeca* (L.) Rchb. subsp. *graeca* +, *Ballota hispanica* (L.) Benth. +; **Rel. 3:** *Euphorbia ceratocarpa* Ten. 1, *Erica multiflora* L. subsp. *multiflora* 1; **Rel. 4:** *Erica multiflora* L. subsp. *multiflora* 1, *Pallenis spinosa* (L.) Cass. +; **Rel. 5:** *Micromeria graeca* subsp. *fruticulosa* (Bertol.) Guinea 1, *Salvia rosmarinus* Schleid. +, *Petrosedum sediforme* (Jacq.) Grulich +, *Coronilla valentina* L. +; **Rel. 6:** *Micromeria graeca* subsp. *fruticulosa* (Bertol.) Guinea 2, *Coronilla valentina* L. 2, *Salvia rosmarinus* Schleid. 1, *Petrosedum sediforme* (Jacq.) Grulich 1,

*Asphodeline lutea* (L.) Rchb. 1; Rel. 7: *Lomelosia cretica* (L.) Greuter & Burdet 1, *Lobularia maritima* (L.) Desv. subsp. *maritima* +; Rel. 8: *Arundo plinii* Turra 1, *Arum italicum* Mill. subsp. *italicum*; Rel. 11: *Arum italicum* Mill. subsp. *italicum* 1, *Spartium junceum* L. +; Rel. 12: *Ferulago nodosa* (L.) Boiss. 1, *Micromeria graeca* (L.) Rchb. subsp. *graeca* +, *Foeniculum vulgare* Mill. subsp. *piperitum* (Ucria) Bég. +; – *cercidetosum siliquastri* – Rel. 13: *Biarum tenuifolium* (L.) Schott subsp. *tenuifolium* +; Rel. 14: *Centranthus ruber* (L.) DC. subsp. *ruber* +; Rel. 15: *Biarum tenuifolium* (L.) Schott subsp. *tenuifolium*; Rel. 16: *Opuntia ficus-indica* (L.) Mill. 1; – *celtidetosum australis* (rel. 17-20) – Rel. 17: *Clinopodium nepeta* (L.) Kuntze subsp. *nepeta* 1, *Euphorbia ceratocarpa* Ten. +, *Centranthus ruber* (L.) DC. subsp. *ruber* +; Rel. 18: *Opuntia ficus-indica* (L.) Mill. 2, *Clinopodium nepeta* (L.) Kuntze subsp. *nepeta* 1; Rel. 19: *Carlina corymbosa* L. 1, *Melica ciliata* L. subsp. *ciliata* +, *Lactuca viminea* (L.) J.Presl & C.Presl subsp. *viminea* +, *Clinopodium nepeta* (L.) Kuntze subsp. *nepeta* +; Rel. 20: *Opuntia ficus-indica* (L.) Mill. 1, *Melica ciliata* L. subsp. *ciliata* 1, *Lactuca viminea* (L.) J.Presl & C.Presl subsp. *viminea* +, *Carlina corymbosa* L. +, *Ballota hispanica* (L.) Benth. +.

**Table S2 – *Ruto chalepensis-Oleetum sylvestris* subass. *euphorbietosum bivonae* –**

Rel. 21: *Pallenis spinosa* (L.) Cass. +, *Biarum tenuifolium* (L.) Schott subsp. *tenuifolium* +; Rel. 23: *Biarum tenuifolium* (L.) Schott subsp. *tenuifolium* 1; Rel. 24: *Biarum tenuifolium* (L.) Schott subsp. *tenuifolium* 1; Rel. 25: *Vicia villosa* Roth 1, *Geranium purpureum* Vill. 1, *Spartium junceum* L. +, *Clinopodium nepeta* (L.) Kuntze subsp. *nepeta* +; Rel. 32: *Lomelosia cretica* (L.) Greuter & Burdet +; Rel. 33: *Lomelosia cretica* (L.) Greuter & Burdet +, *Arum italicum* Mill. subsp. *italicum* +; Rel. 34: *Lomelosia cretica* (L.) Greuter & Burdet 1; Rel. 35: *Lomelosia cretica* (L.) Greuter

& Burdet +; Rel. 38: *Micromeria graeca* subsp. *fruticulosa* (Bertol.) Guinea 1; Rel. 41: *Micromeria graeca* (L.) Rchb. subsp. *graeca* 1; Rel. 42: *Micromeria graeca* (L.) Rchb. subsp. *graeca* +; Rel. 43: *Petrosedum sediforme* (Jacq.) Grulich 1, *Lomelosia cretica* (L.) Greuter & Burdet 1.

**Table S3 – *Ruto chalepensis*-*Oleetum sylvestris* subass. *ramnetosum oleoidis* – Rel.**  
 44: *Lobularia maritima* (L.) Desv. subsp. *maritima* +, *Leontodon tuberosus* L. +; Rel.  
 45: *Erica multiflora* L. subsp. *multiflora* 1, *Mandragora autumnalis* Bertol. +,  
*Leontodon tuberosus* L. +; Rel. 46: *Mandragora autumnalis* Bertol. +, *Carduus*  
*pycnocephalus* L. subsp. *pycnocephalus* +; Rel. 47: *Reichardia picroides* (L.) Roth  
 +; Rel. 48: *Urtica membranacea* Poir. 1; Rel. 49: *Magydaris pastinacea* (Lam.) Paol. 1,  
*Polypodium cambricum* L. +; Rel. 50: *Magydaris pastinacea* (Lam.) Paol. 1,  
*Polypodium cambricum* L. +, *Pallenis spinosa* (L.) Cass. +; Rel. 51: *Magydaris*  
*pastinacea* (Lam.) Paol. 2; Rel. 52: *Magydaris pastinacea* (Lam.) Paol. 1, *Sonchus*  
*tenerimus* L. +; Rel. 53: *Magydaris pastinacea* (Lam.) Paol. +; Rel. 54: *Sonchus*  
*tenerimus* L. +, *Magydaris pastinacea* (Lam.) Paol. +; – **subass. *periplocetosum***  
***angustifoliae*** – Rel. 55: *Vicia benghalensis* L. 1; Rel. 56: *Vicia benghalensis* L. 1,  
*Coleostephus myconis* (L.) Cass. ex Rchb.f. +; Rel. 57: *Reichardia picroides* (L.) Roth  
 1, *Micromeria graeca* (L.) Rchb. subsp. *graeca* 1; Rel. 58: *Opuntia ficus-indica* (L.)  
 Mill. 1, *Polypodium cambricum* L. +; Rel. 59: *Polypodium cambricum* L..

**Table S4 – *Chamaeropo humilis*-*Oleetum sylvestris* subass. *acanthetosum mollis* –**  
 Rel. 60: *Parietaria judaica* L. 2, *Opuntia ficus-indica* (L.) Mill. 2, *Acacia karro* Hayne  
 1, *Ficus carica* L. +; Rel. 61: *Parietaria judaica* L. 2, *Ficus carica* L. 1; Rel. 62: *Rhus*  
*coriaria* L. 1, *Parietaria judaica* L. 1; Rel. 63: *Ficus carica* L. 1; Rel. 64: *Opuntia*

*figus-indica* (L.) Mill. 1, *Ficus carica* L. 1; Rel. 65: *Thymbra capitata* (L.) Cav. +, *Petrosedum sediforme* (Jacq.) Grulich +, *Micromeria graeca* (L.) Rchb. subsp. *graeca* +; Rel. 66: *Micromeria graeca* (L.) Rchb. subsp. *graeca* +; Rel. 67: *Urtica membranacea* Poir. 1; Rel. 68: *Thymbra capitata* (L.) Cav. 2, *Parietaria judaica* L. +, *Daucus carota* L. +, *Arundo plinii* Turra +; Rel. 69: *Arundo plinii* Turra 2, *Thymbra capitata* (L.) Cav. 1, *Parietaria judaica* L. 1; Rel. 70: *Ficus carica* L. 2, *Urtica membranacea* Poir. +, *Scrophularia peregrina* L. +; Rel. 71: *Ficus carica* L. 1, *Scrophularia peregrina* L. +; Rel. 73: *Opuntia ficus-indica* (L.) Mill. 2, *Andropogon distachyos* L. +; Rel. 74: *Geranium purpureum* Vill. 2, *Lathyrus oleraceus* Lam. subsp. *biflorus* (Raf.) H.Schaeff., Coulot & Rabaute 1; Rel. 75: *Magydaris pastinacea* (Lam.) Paol. +, *Cistus creticus* L. subsp. *creticus* +; Rel. 76: *Geranium purpureum* Vill. 2, *Galactites tomentosus* Moench +; Rel. 77: *Crataegus monogyna* Jacq. 1, *Silene latifolia* Poir. +, *Kundmannia sicula* (L.) DC. +, *Galactites tomentosus* Moench +; Rel. 78: *Urtica membranacea* Poir. +, *Silene latifolia* Poir. +, *Kundmannia sicula* (L.) DC. +, *Galactites tomentosus* Moench +; Rel. 79: *Geranium purpureum* Vill. 1, *Magydaris pastinacea* (Lam.) Paol. +, *Lathyrus oleraceus* Lam. subsp. *biflorus* (Raf.) H.Schaeff., Coulot & Rabaute +, *Lathyrus clymenum* L. +, *Galactites tomentosus* Moench +; Rel. 80: *Geranium purpureum* Vill. 1, *Kundmannia sicula* (L.) DC. +, *Galactites tomentosus* Moench +, *Cistus creticus* L. subsp. *creticus* +; Rel. 81: *Petrosedum sediforme* (Jacq.) Grulich +, *Micromeria graeca* (L.) Rchb. subsp. *graeca* +, *Lathyrus oleraceus* Lam. subsp. *biflorus* (Raf.) H.Schaeff., Coulot & Rabaute +, *Geranium purpureum* Vill. +, *Cistus creticus* L. subsp. *creticus* +; Rel. 82: *Urtica membranacea* Poir. 1; Rel. 83: *Urtica membranacea* Poir. 2, *Reichardia picroides* (L.) Roth +, *Geranium purpureum* Vill. +; Rel. 84: *Urtica membranacea* Poir. 1, *Clinopodium nepeta* (L.) Kuntze subsp. *nepeta* +; Rel. 85: *Urtica membranacea* Poir. 2, *Geranium purpureum* Vill. +; Rel. 86:

*Silene latifolia* Poir. 1, *Urtica membranacea* Poir. +, *Urospermum dalechampii* (L.) F. W. Schmidt +, *Micromeria graeca* subsp. *fruticulosa* (Bertol.) Guinea +; Rel. 87: *Reichardia picroides* (L.) Roth +.

**Table S5 – *Chamaeropo humilis-Oleetum sylvestris* subass. *ephedretosum fragilis* –**

Rel. 88: *Rhus coriaria* L. 1, *Arum italicum* Mill. subsp. *italicum* 1; Rel. 89: *Arum italicum* Mill. subsp. *italicum* 3; Rel. 90: *Cistus creticus* L. subsp. *creticus*; Rel. 91: *Cistus creticus* L. subsp. *creticus*; Rel. 92: *Ferulago nodosa* (L.) Boiss. 1, *Crataegus monogyna* Jacq. 1; Rel. 94: *Micromeria graeca* subsp. *fruticulosa* (Bertol.) Guinea 1, *Cistus creticus* L. subsp. *creticus* 1; Rel. 95: *Micromeria graeca* subsp. *fruticulosa* (Bertol.) Guinea +, *Cistus creticus* L. subsp. *creticus* +; Rel. 96: *Micromeria graeca* subsp. *fruticulosa* (Bertol.) Guinea +, *Cistus creticus* L. subsp. *creticus* +; Rel. 98: *Thymbra capitata* (L.) Cav. +; Rel. 100: *Thymbra capitata* (L.) Cav. 1; Rel. 101: *Pimpinella peregrina* L. 1; Rel. 102: *Thymbra capitata* (L.) Cav. 1, *Cistus creticus* L. subsp. *creticus* 1, *Pimpinella peregrina* L. +.

**Table S6 – *Calicotomo infestae-Oleetum sylvestris* subass. *typicum* (rel. 104-115) Rel.**

104: *Arundo plinii* Turra 1; Rel. 107: *Arundo plinii* Turra 1, *Magydaris pastinacea* (Lam.) Paol. +, *Eryngium tricuspidatum* L. subsp. *bocconeii* (Lam.) Wörz +; Rel. 108: *Vicia villosa* Roth 1, *Rhus coriaria* L. 1, *Erica multiflora* L. subsp. *multiflora* 1; Rel. 109: *Spartium junceum* L. 1, *Clinopodium nepeta* (L.) Kuntze subsp. *nepeta* 1, *Arum italicum* Mill. subsp. *italicum* 1; Rel. 110: *Spartium junceum* L. 1, *Clinopodium nepeta* (L.) Kuntze subsp. *nepeta* +, *Arum italicum* Mill. subsp. *italicum* 1; Rel. 111: *Micromeria graeca* subsp. *fruticulosa* (Bertol.) Guinea 1, *Clinopodium nepeta* (L.) Kuntze subsp. *nepeta* +, *Arundo plinii* Turra +; Rel. 112: *Urtica membranacea* Poir. +,



*Cynoglossum creticum* Mill. +; Rel. 113: *Crataegus monogyna* Jacq. +, *Clinopodium nepeta* (L.) Kuntze subsp. *nepeta* +; Rel. 115: *Spartium junceum* L. 1, *Melica ciliata* L. subsp. *ciliata* 1; – **subass. *asplenietosum obovatae*** (rel. 116-120). Rel. 116: *Parietaria judaica* L. 1, *Micromeria graeca* (L.) Rchb. subsp. *graeca* 1, *Ambrosina bassii* L. 1, *Torilis nodosa* (L.) Gaertn. subsp. *nodosa* +, *Sedum cepaea* L +, *Geranium purpureum* Vill. +, *Achillea ligustica* All. +; Rel. 117: *Polypodium cambricum* L. 1, *Clinopodium nepeta* (L.) Kuntze subsp. *nepeta* 1, *Biarum tenuifolium* (L.) Schott subsp. *tenuifolium* 1, *Achillea ligustica* All. 1, *Galactites tomentosus* Moench +, *Ballota hispanica* (L.) Benth. +; Rel. 118: *Polypodium cambricum* L. 1, *Micromeria graeca* (L.) Rchb. subsp. *graeca* 1, *Ballota hispanica* (L.) Benth. 1; Rel. 119: *Sedum cepaea* L 1, *Micromeria graeca* (L.) Rchb. subsp. *graeca* 1, *Polypodium cambricum* L. +, *Pimpinella peregrina* L. +, *Erucastrum virgatum* C. Presl subsp. *virgatum* +, *Daucus carota* L. +, *Ballota hispanica* (L.) Benth. +, *Asplenium ceterach* L. subsp. *ceterach* +, *Anogramma leptophylla* (L.) Link +; Rel. 120: *Sedum cepaea* L 1, *Micromeria graeca* (L.) Rchb. subsp. *graeca* 1, *Erucastrum virgatum* C. Presl subsp. *virgatum* 1, *Ballota hispanica* (L.) Benth. 1, *Polypodium cambricum* L. +, *Pimpinella peregrina* L. +, *Daucus carota* L. +, *Asplenium ceterach* L. subsp. *ceterach* +.

#### **Appendix 4: Place and date of the phytosociological relevés**

Tab. S1 - rel. 1: Patti, Promontorio Tindari (24/04/06); Tab. S1 - rel. 2: Isnello, Aquileia (26/05/09); Tab. S1 - rel. 3: Modica, Cava d'Ispica (17/09/17); Tab. S1 - rel. 4: Rosolini, Cava d'Ispica (17/09/16); Tab. S1 - rel. 5: Termini Imerese, Fiume San Leonardo (14/04/07); Tab. S1 - rel. 6: Altavilla Milicia, Torre Normanna (18/05/07); Tab. S1 - rel. 7: Santo Stefano Quisquina, C.da Liste Inferno (22/04/15); Tab. S1 - rel. 8: Patti,

Promontorio Tindari (25/04/06); Tab. S1 - rel. 9: Patti, Promontorio Tindari (24/04/06);  
Tab. S1 - rel. 10: Patti, Promontorio Tindari (24/04/06); Tab. S1 - rel. 11: Castelbuono,  
Gole di Tiberio (10/05/12); Tab. S1 - rel. 12: Sortino, Valle dell'Anapo (07/05/17); Tab.  
S1 - rel. 13: Palermo, Monte Pellegrino (26/04/18); Tab. S1 - rel. 14: Palermo, Monte  
Pellegrino (26/04/18); Tab. S1 - rel. 15: Palermo, Monte Pellegrino (28/04/14); Tab. S1  
- rel. 16: Palermo, Monte Pellegrino (26/04/18); Tab. S1 - rel. 17: Aci Sant'Antonio,  
Piano San Giovanni (26/05/18); Tab. S1 - rel. 18: Belpasso, C.da Giovencheria  
(10/06/11); Tab. S1 - rel. 19: Aci Sant'Antonio, Piano San Giovanni (26/05/18); Tab.  
S1 - rel. 20: Acireale, C.da Pizzone (26/05/18); Tab. S2 - rel. 21: Palermo, Monte  
Pellegrino (25/05/11); Tab. S2 - rel. 22: Palermo, Monte Pellegrino (12/05/12); Tab. S2  
- rel. 23: Palermo, Monte Pellegrino (01/12/07); Tab. S2 - rel. 24: Palermo, Monte  
Pellegrino (17/01/12); Tab. S2 - rel. 25: Palermo, Monte Pellegrino (15/03/09); Tab. S2  
- rel. 26: Palermo, Monte Pellegrino (01/05/13); Tab. S2 - rel. 27: Custonaci, Riserva  
Monte Cofano (13/10/00); Tab. S2 - rel. 28: Custonaci, Riserva Monte Cofano  
(13/10/00); Tab. S2 - rel. 29: Custonaci, Monte Palatimone (13/10/00); Tab. S2 - rel. 30:  
Custonaci, Monte Palatimone (13/10/00); Tab. S2 - rel. 31: Custonaci, Monte  
Palatimone (13/10/00); Tab. S2 - rel. 32: Partinico, Santuario Madonna del Ponte  
(07/05/14); Tab. S2 - rel. 33: Custonaci, Mt. Cofano (15/02/01); Tab. S2 - rel. 34:  
Custonaci, Mt. Cofano (15/02/01); Tab. S2 - rel. 35: Custonaci, Monte Cofano  
(12/04/12); Tab. S2 - rel. 36: Custonaci, Monte Palatimone (13/04/06); Tab. S2 - rel. 37:  
Palermo, Monte Gallo (24/04/12); Tab. S2 - rel. 38: Palermo, Monte Gallo (01/05/06);  
Tab. S2 - rel. 39: Erice, C.da Pizzolungo (11/05/11); Tab. S2 - rel. 40: Palermo, Monte  
Pellegrino presso l'Addaura (21/04/16); Tab. S2 - rel. 41: Burgio, Castello Gristia  
(20/05/11); Tab. S3 - rel. 42: Burgio, Castello Gristia (20/05/11); Tab. S2 - rel. 43: San  
Giuseppe Jato, Pizzo Mirabella (27/05/14); Tab. S3 - rel. 44: Levanzo, Capo Grosso

(09/05/03); Tab. S3 - rel. 45: Levanzo, Punta Genovese (09/05/03); Tab. S3 - rel. 46: Levanzo, Capo Grosso (09/05/03); Tab. S3 - rel. 47: Levanzo, La Fossa (12/05/10); Tab. S3 - rel. 48: Levanzo, La Fossa (13/05/10); Tab. S3 - rel. 49: Favignana, Montagna Grossa (14/05/05); Tab. S3 - rel. 50: Mistretta, Montagna Grossa (14/05/05); Tab. S3 - rel. 51: Favignana, Montagna Grossa (14/05/05); Tab. S3 - rel. 52: Favignana, Montagna Grossa (14/05/05); Tab. S3 - rel. 53: Favignana, Montagna Grossa (14/05/05); Tab. S3 - rel. 54: Ciminna, Montagna Grossa (14/05/05); Tab. S3 - rel. 55: Pantelleria, C.da Favare (11/04/03); Tab. S3 - rel. 56: Pantelleria, C.da Favare (11/04/03); Tab. S3 - rel. 57: Pantelleria, C.da Favare (24/04/17); Tab. S3 - rel. 58: Linosa, C.da Grotta (23/04/01); Tab. S3 - rel. 59: Linosa, C.da Grotta (23/04/01); Tab. S4 - rel. 60: Palermo, Fuime Oretto (06/08/11); Tab. S4 - rel. 61: Palermo, Fuime Oretto (06/08/11); Tab. S4 - rel. 62: Palermo, Fuime Oretto (06/08/11); Tab. S4 - rel. 63: Palermo, Fuime Oretto (22/02/14); Tab. S4 - rel. 64: Palermo, Fuime Oretto (22/02/14); Tab. S4 - rel. 65: Castelvetro, Castello della Pietra (20/03/08); Tab. S4 - rel. 66: Castelvetro, Castello della Pietra (20/03/08); Tab. S4 - rel. 67: Castelvetro, Castello della Pietra (20/03/08); Tab. S4 - rel. 68: Campobello di Mazara, Cave di Cusa (01/05/18); Tab. S4 - rel. 69: Campobello di Mazara, Cave di Cusa (01/05/18); Tab. S4 - rel. 70: Partinico, Fiume Iato (17/04/14); Tab. S4 - rel. 71: Partinico, Fiume Iato (17/04/14); Tab. S4 - rel. 72: Calatafimi, C.da Scorciagatto (30/04/10); Tab. S4 - rel. 73: Partinico, Fiume Iato (17/04/14); Tab. S4 - rel. 74: Castelvetro, Strada del Filo (24/04/05); Tab. S4 - rel. 75-81: Castelvetro, Strada del Filo (10/05/07); Tab. S4 - rel. 82-85: Castelvetro, Strada del Filo (24/04/05); Tab. S4 - rel. 86-87: Castelvetro, Strada del Filo (09/05/07); Tab. S5 - rel. 88: Partinico, Fiume Iato (15/04/14); Tab. S5 - rel. 89: Partinico, Fiume Iato (15/04/14); Tab. S5 - rel. 90: Gela, C.da Piano Stella (16/09/16); Tab. S5 - rel. 91: Gela, C.da Piano Stella (16/09/16); Tab. S5 - rel. 92:

Acate, C.da Litteri (16/09/16); Tab. S5 - rel. 93: Acate, C.da Litteri (16/09/16); Tab. S5 - rel. 94-96: Partinico, Cozzo Ciluffo (01/04/14); Tab. S5 - rel. 97: Partinico, Torrente Forgitella (30/04/14); Tab. S5 - rel. 98-102: Partinico, Scarpate Piano Fico (01/04/14); Tab. S5 - rel. 103: Partinico, Scarpate Piano Fico (01/04/14); Tab. S6 - rel. 104: Calatafimi, C.da Vignazzi (19/11/16); Tab. S6 - rel. 105: Calatafimi, C.da Vignazzi (30/04/10); Tab. S6 - rel. 106: Buseto Palizzolo, Monte Scorace (12/10/05); Tab. S6 - rel. 107: Buseto Palizzolo, Monte Scorace (12/10/05); Tab. S6 - rel. 108: Bolognetta, P.zo Mangiatoriello (30/04/09); Tab. S6 - rel. 109: Mistretta, C.da di Zupardo (13/11/16); Tab. S6 - rel. 110: Mistretta, C.da Zupardo (14/11/16); Tab. S6 - rel. 111: Caronia, C.da Onofrio (23/04/10); Tab. S6 - rel. 112: Tusa, Milianni (27/05/11); Tab. S6 - rel. 113: Tusa, C.da Marro (29/11/13); Tab. S6 - rel. 114: Centuripe, Strada Cesarò-Adrano (13/07/18); Tab. S6 - rel. 115: Bronte, Strada Cesarò-Adrano (13/07/18); Tab. S6 - rel. 116: Mazzarrà Sant'Andrea, C.da Musclonita (29/05/18); Tab. S6 - rel. 117: Santa Lucia del Mela, Castello (29/05/18); Tab. S6 - rel. 118: Santa Lucia del Mela, Torrente Mela (18/05/11); Tab. S6 - rel. 119: Santa Lucia del Mela, Torrente Mela (17/06/11); Tab. S6 - rel. 120: Santa Lucia del Mela, Torrente Mela (17/06/11).
