# Supplementary material
Source: publisher figshare collection journal article supplement (https://tandf.figshare.com/articles/dataset/_/11310854)
Supplement: Supplementary file 2 [file 2]

**Table S1.** Phytosociological table of *Ruto chalepensis*-*Oleetum sylvestris* subass. *oleetosum sylvestris* (rel. 1-12), subass. *cercidetosum siliquastrum* (rel. 14-16) and subass. *celtidetosum australis* (rel. 17-20).

|                                          |     |     |     |     |     |     |     |     |     |     |     |     |     |     |     |     |     |     |     |     |
|------------------------------------------|-----|-----|-----|-----|-----|-----|-----|-----|-----|-----|-----|-----|-----|-----|-----|-----|-----|-----|-----|-----|
| Relevé (n°)                              | 1   | 2   | 3   | 4   | 5   | 6   | 7   | 8   | 9   | 10  | 11  | 12  | 13  | 14  | 15  | 16  | 17  | 18  | 19  | 20  |
| Altitude (m)                             | 118 | 389 | 360 | 110 | 110 | 20  | 680 | 200 | 15  | 50  | 95  | 230 | 140 | 140 | 140 | 130 | 260 | 328 | 250 | 180 |
| Slope(°)                                 | 40  | 15  | 25  | 25  | 30  | 70  | 60  | 70  | 74  | 14  | 45  | 10  | 20  | 20  | 20  | 25  | 15  | 30  | 20  | 18  |
| Aspect                                   | SE  | 5   | NE  | E   | E   | SE  | SW  | SW  | W   | W   | SW  | S   | SW  | SW  | SW  | SW  | E   | S   | E   | E   |
| Area (m2)                                | 100 | 150 | 100 | 120 | 80  | 100 | 120 | 100 | 100 | 100 | 100 | 100 | 120 | 120 | 120 | 120 | 150 | 200 | 150 | 150 |
| Total cover (%)                          | 100 | 90  | 100 | 100 | 100 | 80  | 100 | 100 | 100 | 100 | 100 | 100 | 100 | 100 | 100 | 100 | 100 | 100 | 100 | 100 |
| Three cover (%)                          | 85  | 90  | 100 | 100 | 80  | 30  | 100 | 82  | 80  | 100 | 100 | 100 | 100 | 100 | 100 | 100 | 100 | 100 | 100 | 100 |
| Woody cover (%)                          | 85  | 90  | 100 | 100 | 80  | 70  | 100 | 82  | 80  | 100 | 100 | 100 | 100 | 100 | 100 | 100 | 100 | 100 | 100 | 100 |
| Herbaceous cover (%)                     | 40  | 70  | 20  | 20  | 70  | 40  | 40  | 40  | 40  | 30  | 30  | 50  | 40  | 50  | 50  | 40  | 20  | 30  | 30  | 30  |
| Average height of the dominant layer (m) | 3,5 | 3   | 6,5 | 4,5 | 3   | 2,8 | 4   | 3,5 | 3   | 3,2 | 4,5 | 4,5 | 4,5 | 4,2 | 5   | 4   | 4   | 4   | 4   | 4,5 |
| Species per relevé                       | 25  | 13  | 24  | 25  | 20  | 21  | 24  | 24  | 23  | 20  | 20  | 21  | 21  | 20  | 27  | 22  | 19  | 21  | 18  | 16  |

**Char. and diff. of association and subass. *oleetosum sylvestris***

*Olea europaea* L. var. *sylvestris* (Mill.) Lehr

*Euphorbia dendroides* L.

*Ruta chalepensis* L.

*Pistacia terebinthus* L. subsp. *terebinthus*

|   |   |   |   |   |   |   |   |   |   |   |   |   |   |   |   |   |   |   |   |
|---|---|---|---|---|---|---|---|---|---|---|---|---|---|---|---|---|---|---|---|
| 4 | 5 | 5 | 4 | 4 | 4 | 5 | 5 | 4 | 4 | 5 | 5 | 4 | 5 | 5 | 4 | 5 | 5 | 5 | 5 |
| 2 | 3 | 1 | 2 | 1 | 1 | 2 | 1 | 1 | 1 | 1 | 3 | 2 | 2 | 1 | 2 | 2 | 2 | 1 | 1 |
| 1 | + | 1 | + | + | 1 | . | . | . | . | . | 1 | + | 2 | 1 | + | . | . | . | . |
| . | 2 | 3 | 2 | 1 | . | 2 | . | . | . | 1 | 1 | 2 | 1 | 2 | . | 2 | 3 | 2 | 1 |

**Diff. subass. *cercidetosum siliquastrum* and *celtidetosum australis***

*Cercis siliquastrum* L. subsp. *siliquastrum*

*Pennisetum setaceum* (Forssk.) Chiov.

*Celtis australis* L. subsp. *australis*

|   |   |   |   |   |   |   |   |   |   |   |   |   |   |   |   |   |   |   |   |
|---|---|---|---|---|---|---|---|---|---|---|---|---|---|---|---|---|---|---|---|
| . | . | . | . | . | . | . | . | . | . | . | . | 3 | 3 | 2 | 3 | . | . | . | . |
| . | . | . | . | . | . | . | . | . | . | . | . | 2 | 1 | 2 | 1 | . | . | . | . |
| . | . | . | . | . | . | . | . | . | . | . | . | . | . | 1 | . | 1 | 2 | 3 | 1 |

**Char. of alliance and order**

*Pistacia lentiscus* L.

*Allium subhirsutum* L. subsp. *subhirsutum*

*Stachys major* (L.) Bartolucci & Peruzzi

*Asparagus albus* L.

*Clematis cirrhosa* L.

*Teucrium fruticans* L. subsp. *fruticans*

*Ceratonia siliqua* L.

*Teucrium flavum* L. subsp. *flavum*

*Anagyris foetida* L.

*Artemisia arborescens* (Vaill.) L.

*Chamaerops humilis* L.

*Lonicera implexa* Aiton subsp. *implexa*

|   |   |   |   |   |   |   |   |   |   |   |   |   |   |   |   |   |   |   |   |
|---|---|---|---|---|---|---|---|---|---|---|---|---|---|---|---|---|---|---|---|
| 2 | . | . | . | 1 | 2 | 3 | 2 | 2 | 2 | 1 | 3 | . | . | 1 | 1 | . | 3 | . | . |
| + | . | 1 | 1 | 1 | + | 1 | . | . | . | . | 1 | 1 | + | 1 | + | + | 1 | 1 | 1 |
| + | . | + | 1 | 1 | + | 1 | + | 1 | 1 | . | 1 | 1 | 1 | 1 | + | 1 | 2 | 1 | + |
| . | 2 | . | . | 1 | + | 1 | . | . | . | 2 | . | . | 1 | + | 1 | + | 1 | 1 | 1 |
| 1 | 1 | . | 1 | 1 | + | . | + | + | . | . | . | 1 | 1 | 2 | 2 | 2 | 2 | 2 | 1 |
| . | . | . | 1 | 1 | 1 | . | + | 1 | 1 | . | . | . | . | . | . | . | . | . | . |
| . | . | 1 | . | 1 | 2 | . | . | . | . | . | 1 | . | . | 1 | . | . | . | . | . |
| . | . | 1 | + | . | + | 2 | . | . | . | . | . | 1 | + | 2 | 1 | 1 | + | . | + |
| . | . | . | 1 | . | . | 2 | 1 | . | 1 | . | . | . | . | 1 | + | . | . | . | . |
| . | . | . | . | 1 | + | 1 | + | . | . | . | 1 | . | . | . | . | . | . | . | . |
| . | . | . | 1 | . | . | . | . | . | . | . | . | . | . | . | . | . | . | . | . |
| . | . | . | . | . | . | . | . | . | . | . | . | . | . | . | . | . | . | + | . |

**Char. of class**

*Asparagus acutifolius* L.

*Smilax aspera* L.

*Rhamnus alaternus* L. subsp. *alaternus*

|   |   |   |   |   |   |   |   |   |   |   |   |   |   |   |   |   |   |   |   |
|---|---|---|---|---|---|---|---|---|---|---|---|---|---|---|---|---|---|---|---|
| 1 | 1 | 1 | . | + | + | + | 1 | 1 | + | + | 2 | + | + | + | . | 1 | 1 | 2 | 2 |
| 2 | + | 1 | 1 | . | . | . | 2 | + | . | 1 | 1 | 1 | 1 | 1 | 2 | 1 | 1 | 2 | 1 |
| 2 | . | 3 | 1 | 1 | + | 1 | 1 | . | . | 1 | 2 | 1 | . | 1 | 1 | 1 | 2 | 2 | 2 |

[illegible]

**Table S2.** Phytosociological table of *Ruto chalepensis*-*Oleetum sylvestris* subass. *euphorbietosum bivonae*.

|                                                                      |     |     |     |     |     |     |     |     |     |     |     |     |     |     |     |     |     |     |     |     |     |     |     |
|----------------------------------------------------------------------|-----|-----|-----|-----|-----|-----|-----|-----|-----|-----|-----|-----|-----|-----|-----|-----|-----|-----|-----|-----|-----|-----|-----|
| Relevé (n°)                                                          | 21  | 22  | 23  | 24  | 25  | 26  | 27  | 28  | 29  | 30  | 31  | 32  | 33  | 34  | 35  | 36  | 37  | 38  | 39  | 40  | 41  | 42  | 43  |
| Altitude (m)                                                         | 560 | 570 | 550 | 540 | 580 | 310 | 90  | 130 | 223 | 221 | 225 | 580 | 130 | 100 | 50  | 250 | 460 | 430 | 240 | 47  | 375 | 380 | 720 |
| Slope(°)                                                             | 70  | 40  | 45  | 50  | 20  | 10  | 12  | 15  | 10  | 15  | 5   | 15  | 10  | 25  | 20  | 15  | 10  | 5   | 5   | 40  | 40  | 30  | 70  |
| Aspect                                                               | S   | SW  | S   | SW  | NW  | E   | NE  | NE  | W   | W   | W   | S   | E   | NE  | NE  | W   | E   | S   | NW  | NW  | S   | S   | S   |
| Area (m2)                                                            | 120 | 150 | 150 | 150 | 80  | 100 | 120 | 120 | 120 | 150 | 120 | 150 | 100 | 150 | 150 | 100 | 100 | 100 | 80  | 100 | 100 | 100 | 150 |
| Total cover (%)                                                      | 100 | 100 | 90  | 100 | 85  | 95  | 90  | 90  | 90  | 90  | 95  | 100 | 95  | 90  | 90  | 90  | 95  | 85  | 100 | 95  | 100 | 100 | 100 |
| Three cover (%)                                                      | 100 | 100 | 90  | 100 | 85  | 60  | 90  | 90  | 95  | 90  | 85  | 100 | 90  | 85  | 90  | 80  | 95  | 75  | 85  | 40  | 80  | 90  | 90  |
| Woody cover (%)                                                      | 100 | 100 | 90  | 100 | 85  | 60  | 90  | 90  | 95  | 90  | 85  | 100 | 90  | 85  | 90  | 80  | 95  | 75  | 90  | 70  | 80  | 90  | 90  |
| Herbaceous cover (%)                                                 | 50  | 40  | 45  | 40  | 25  | 30  | 60  | 50  | 50  | 60  | 50  | 35  | 50  | 45  | 50  | 30  | 30  | 40  | 50  | 50  | 50  | 40  | 40  |
| Average height of the dominant layer (m)                             | 4,5 | 5   | 6   | 4,5 | 3,5 | 4   | 3,2 | 3   | 3,5 | 3,2 | 3,5 | 4   | 3,2 | 3,2 | 1,5 | 3,5 | 2,8 | 3,5 | 3,5 | 3   | 4,5 | 4,5 | 2,8 |
| Species per relevé                                                   | 24  | 23  | 21  | 25  | 29  | 17  | 18  | 17  | 18  | 22  | 18  | 25  | 21  | 24  | 14  | 12  | 21  | 20  | 19  | 19  | 20  | 13  | 12  |
| <b>Char. and diff. of association</b>                                |     |     |     |     |     |     |     |     |     |     |     |     |     |     |     |     |     |     |     |     |     |     |     |
| <i>Olea europaea</i> L. var. <i>syvestris</i> (Mill.) Lehr           | 5   | 5   | 5   | 5   | 4   | 4   | 4   | 4   | 5   | 4   | 4   | 5   | 4   | 4   | 4   | 5   | 5   | 5   | 4   | 4   | 4   | 5   | 4   |
| <i>Euphorbia dendroides</i> L.                                       | 2   | 3   | 2   | 3   | 1   | 4   | 4   | 4   | 2   | 3   | 3   | 2   | 3   | 2   | 3   | 2   | 1   | 1   | 3   | 3   | 3   | 2   | 2   |
| <i>Ruta chalepensis</i> L.                                           | +   | 2   | +   | .   | +   | 2   | 2   | 2   | +   | 1   | 1   | +   | +   | +   | 1   | 1   | 2   | .   | 1   | .   | +   | .   | +   |
| <i>Pistacia terebinthus</i> L. subsp. <i>terebinthus</i>             | 1   | +   | .   | .   | 1   | .   | .   | .   | .   | .   | .   | 2   | 2   | 2   | .   | 1   | .   | .   | 1   | .   | 1   | 2   |     |
| <b>Char. and diff. subassociation</b>                                |     |     |     |     |     |     |     |     |     |     |     |     |     |     |     |     |     |     |     |     |     |     |     |
| <i>Euphorbia bivonae</i> Steud. subsp. <i>bivonae</i>                | +   | +   | +   | +   | +   | 1   | 1   | 1   | 1   | 1   | 2   | 2   | 1   | +   | 1   | +   | 1   | 2   | .   | 2   | 1   | 1   | 3   |
| <i>Artemisia arborescens</i> (Vaill.) L.                             | .   | .   | +   | +   | +   | .   | 1   | 1   | 1   | 1   | .   | 2   | .   | .   | .   | .   | +   | .   | 2   | 2   | 2   | .   |     |
| <b>Char. of alliance and order</b>                                   |     |     |     |     |     |     |     |     |     |     |     |     |     |     |     |     |     |     |     |     |     |     |     |
| <i>Pistacia lentiscus</i> L.                                         | .   | .   | .   | .   | .   | +   | 1   | .   | 1   | 1   | 1   | +   | .   | .   | .   | .   | 2   | 1   | .   | .   | .   | .   | .   |
| <i>Allium subhirsutum</i> L. subsp. <i>subhirsutum</i>               | +   | +   | +   | +   | 1   | 1   | .   | .   | .   | .   | .   | 1   | .   | .   | .   | .   | 1   | 1   | .   | 2   | +   | .   | .   |
| <i>Stachys major</i> (L.) Bartolucci & Peruzzi                       | 1   | +   | 1   | +   | 2   | 2   | 2   | .   | 1   | 1   | 1   | +   | +   | +   | 1   | 1   | +   | +   | +   | .   | 2   | 1   | 2   |
| <i>Asparagus albus</i> L.                                            | 2   | 2   | 1   | 1   | 1   | 1   | 2   | 2   | 1   | 1   | 1   | 2   | 1   | 1   | 1   | 1   | 1   | +   | 1   | .   | 2   | 2   | .   |
| <i>Chamaerops humilis</i> L.                                         | .   | +   | .   | .   | .   | 1   | .   | 1   | 1   | .   | 1   | +   | 2   | 1   | 2   | 1   | 1   | 1   | 3   | 1   | .   | .   | .   |
| <i>Clematis cirrhosa</i> L.                                          | 2   | 2   | 2   | 2   | 2   | 2   | 1   | .   | .   | .   | .   | +   | 2   | 1   | .   | .   | .   | .   | 1   | .   | .   | .   | .   |
| <i>Teucrium fruticans</i> L. subsp. <i>fruticans</i>                 | .   | .   | .   | .   | +   | .   | .   | .   | .   | .   | .   | .   | .   | .   | .   | +   | 3   | 1   | 1   | .   | .   | .   | .   |
| <i>Ephedra fragilis</i> Desf.                                        | .   | .   | .   | .   | .   | .   | .   | 1   | .   | +   | +   | .   | .   | .   | .   | .   | .   | 1   | .   | .   | .   | .   | .   |
| <i>Anagyris foetida</i> L.                                           | .   | .   | .   | .   | .   | .   | .   | .   | .   | .   | .   | +   | .   | .   | .   | .   | .   | .   | .   | 2   | .   | .   | .   |
| <i>Lycium intricatum</i> Boiss.                                      | .   | 1   | .   | .   | .   | .   | .   | .   | .   | .   | .   | .   | .   | .   | .   | .   | .   | .   | .   | .   | .   | .   | .   |
| <i>Ceratonia siliqua</i> L.                                          | .   | .   | .   | .   | .   | .   | .   | .   | .   | .   | .   | .   | .   | .   | .   | .   | .   | 1   | .   | .   | .   | .   | .   |
| <i>Rhamnus lycioides</i> subsp. <i>oleoides</i> (L.) Jahand. & Maire | .   | .   | .   | .   | .   | .   | .   | .   | .   | .   | .   | .   | .   | .   | .   | .   | .   | .   | 2   | .   | .   | .   | .   |
| <i>Teucrium flavum</i> L. subsp. <i>flavum</i>                       | .   | .   | .   | .   | .   | .   | .   | .   | .   | .   | .   | .   | .   | .   | .   | .   | .   | .   | +   | .   | .   | .   | .   |
| <b>Char. of class</b>                                                |     |     |     |     |     |     |     |     |     |     |     |     |     |     |     |     |     |     |     |     |     |     |     |
| <i>Asparagus acutifolius</i> L.                                      | 2   | 2   | 1   | 1   | 2   | 1   | 1   | 1   | 2   | 1   | 1   | 1   | 1   | 1   | +   | .   | +   | .   | 1   | 1   | +   | .   | .   |
| <i>Arisarum vulgare</i> O.Targ.Tozz. subsp. <i>vulgare</i>           | +   | +   | 2   | 3   | 2   | 1   | 2   | 2   | 2   | 1   | 2   | 2   | 2   | 1   | .   | .   | +   | .   | +   | 2   | +   | .   | .   |

|                                                                 |   |   |   |   |   |   |   |   |   |   |   |   |   |   |   |   |   |   |   |   |   |   |   |   |
|-----------------------------------------------------------------|---|---|---|---|---|---|---|---|---|---|---|---|---|---|---|---|---|---|---|---|---|---|---|---|
| <i>Ampelodesmos mauritanicus</i> (Poir.) T.Durand & Schinz      | . | . | . | . | + | . | 1 | . | 1 | 1 | 1 | 1 | + | 2 | 2 | 1 | 1 | 1 | 1 | 2 | 3 | 3 | 2 |   |
| <i>Rubia peregrina</i> L.                                       | 1 | + | 1 | + | 2 | . | 1 | 1 | + | + | . | 1 | + | 1 | + | . | 1 | . | . | 1 | . | . | . |   |
| <i>Phillyrea latifolia</i> L.                                   | 2 | 3 | 2 | + | 1 | . | 1 | 1 | 1 | 1 | 2 | 1 | . | . | . | . | 1 | 1 | . | . | . | . | 1 |   |
| <i>Smilax aspera</i> L.                                         | 3 | 2 | 2 | 3 | 2 | 1 | . | 1 | 1 | + | . | 1 | . | . | 1 | . | . | . | + | . | . | . | . |   |
| <i>Rhamnus alaternus</i> L. subsp. <i>alaternus</i>             | 1 | 1 | + | 1 | . | 1 | . | . | . | . | . | . | + | 3 | . | . | 1 | 1 | . | 1 | . | . | . |   |
| <i>Cyclamen repandum</i> Sm. subsp. <i>repandum</i>             | . | . | . | + | . | . | 1 | 1 | + | 1 | 1 | + | + | + | . | . | + | . | + | . | . | . | . |   |
| <i>Calicotome infesta</i> (C.Presl) Guss. subsp. <i>infesta</i> | . | . | . | . | . | . | . | 1 | . | 1 | 1 | . | . | . | . | 1 | 1 | + | . | . | . | . | . |   |
| <i>Osyris alba</i> L.                                           | . | . | . | . | . | . | . | . | . | . | . | 1 | 1 | 1 | 1 | . | . | . | . | . | 1 | . | . |   |
| <i>Carex hallerana</i> Asso                                     | . | + | . | . | . | + | . | . | . | . | . | . | . | . | . | . | . | + | + | . | . | . | . |   |
| <i>Ruscus aculeatus</i> L.                                      | . | . | . | + | + | . | . | . | . | . | . | . | . | . | . | . | . | . | . | 2 | . | . | . | . |
| <i>Cyclamen hederifolium</i> Aiton subsp. <i>hederifolium</i>   | . | . | . | . | . | . | . | . | . | . | . | . | + | + | . | . | . | . | . | . | . | . | . |   |
| <i>Rosa sempervirens</i> L.                                     | . | . | . | . | 1 | . | . | . | . | . | . | . | . | . | . | . | . | . | . | . | . | . | . |   |
| <i>Hedera helix</i> L. subsp. <i>helix</i>                      | . | . | . | . | . | . | . | . | . | 1 | . | . | . | . | . | . | . | . | . | . | . | . | . |   |
| <i>Tamus communis</i> L.                                        | . | . | . | . | . | . | . | . | . | . | . | . | . | 1 | . | . | . | . | . | . | . | . | . |   |
| <i>Emerus major</i> Mill. subsp. <i>major</i>                   | . | . | . | . | . | . | . | . | . | . | . | . | . | . | . | . | . | . | . | 1 | . | . | . |   |
| <b>Other species</b>                                            |   |   |   |   |   |   |   |   |   |   |   |   |   |   |   |   |   |   |   |   |   |   |   |   |
| <i>Hyparrhenia hirta</i> (L.) Stapf subsp. <i>hirta</i>         | 1 | + | 1 | + | + | 2 | 2 | 1 | 1 | 1 | 1 | + | + | . | . | . | . | 1 | . | . | 2 | 1 | . |   |
| <i>Acanthus mollis</i> L. subsp. <i>mollis</i>                  | 2 | 1 | + | 2 | 1 | 1 | . | . | . | . | . | 1 | . | 1 | . | . | . | . | . | 3 | 1 | + | 1 |   |
| <i>Brachypodium retusum</i> (Pers.) P.Beauv.                    | . | . | . | + | . | . | 2 | 1 | 1 | 1 | . | + | + | 2 | 2 | 2 | . | + | 2 | 2 | . | . | . |   |
| <i>Carlina sicula</i> Ten. subsp. <i>sicula</i>                 | 1 | . | + | . | . | . | . | . | . | . | . | . | + | + | . | . | . | + | . | . | 1 | 1 | . |   |
| <i>Asphodelus ramosus</i> L. subsp. <i>ramosus</i>              | 1 | 2 | 2 | + | + | . | . | . | . | . | . | . | . | . | . | . | . | + | . | 2 | . | . | . |   |
| <i>Asphodelus ramosus</i> L. subsp. <i>ramosus</i>              | 1 | 2 | 2 | + | + | . | . | . | . | . | . | . | . | . | . | . | . | + | . | 2 | . | . | . |   |
| <i>Ferula communis</i> L. subsp. <i>communis</i>                | + | + | . | + | 1 | . | . | . | . | . | . | + | . | . | . | . | . | . | . | . | . | . | 1 |   |
| <i>Phagnalon saxatile</i> (L.) Cass.                            | . | . | + | + | + | . | . | . | . | . | . | . | . | . | 1 | . | . | + | . | . | + | . | . |   |
| <i>Foeniculum vulgare</i> Mill. subsp. <i>vulgare</i>           | . | . | . | + | . | . | 1 | . | . | 1 | 1 | . | + | + | . | . | . | . | . | . | . | . | . |   |
| <i>Oloptum miliaceum</i> (L.) Röser & H.R.Hamasha               | 1 | . | . | . | + | . | . | . | . | . | . | . | . | 1 | . | . | . | . | . | . | 1 | 1 | . |   |
| <i>Bituminaria bituminosa</i> (L.) E.H.Stirt.                   | . | . | + | . | . | . | . | . | . | . | . | . | . | . | . | . | . | . | . | 1 | 1 | + | 1 |   |
| <i>Charybdis pancracion</i> (Steinh.) Speta                     | . | . | . | . | . | . | . | . | . | 1 | + | . | . | . | . | . | . | . | . | . | + | + | 2 |   |
| <i>Dactylis glomerata</i> subsp. <i>hispanica</i> (Roth) Nyman  | + | 1 | . | . | 1 | . | . | . | . | . | . | . | . | . | . | . | . | + | . | . | . | . | . |   |
| <i>Umbilicus horizontalis</i> (Guss.) DC.                       | + | . | . | + | 1 | . | . | . | . | . | . | . | . | . | . | . | . | . | . | . | . | . | . |   |
| <i>Smyrnum olusatrum</i> L.                                     | + | . | . | . | + | . | . | . | . | . | . | . | . | + | . | . | . | . | . | . | . | . | . |   |
| <i>Rubus ulmifolius</i> Schott                                  | . | . | . | . | 1 | . | . | . | . | . | . | . | . | . | . | . | . | . | . | . | . | . | . |   |
| <i>Melica minuta</i> L. subsp. <i>minuta</i>                    | . | . | . | . | . | . | . | . | . | . | . | . | . | . | . | . | . | . | . | 1 | . | . | . |   |
| <i>Oxalis pes-caprae</i> L.                                     | . | . | . | + | . | . | . | . | . | . | . | . | . | . | . | . | . | . | . | . | . | . | . |   |
| <i>Pennisetum setaceum</i> (Forssk.) Chiov.                     | . | . | . | . | . | . | . | . | . | . | . | . | . | . | . | . | . | . | . | + | . | . | . |   |



[illegible]

**Table S4.** Phytosociological table of *Chamaeropo humilis-Oleetum sylvestris* subass. *acanthetosum mollidis*.

| Table 5.11 Phytosociological table of <i>Chamaerops humilis</i> - <i>Olea europaea</i> ssp. <i>sylvestris</i> subass. <i>acanthioides</i> - <i>Myrtus communis</i> |     |     |     |     |     |     |     |     |     |     |     |     |     |     |     |     |     |     |     |     |     |     |     |     |     |     |     |     |
|--------------------------------------------------------------------------------------------------------------------------------------------------------------------|-----|-----|-----|-----|-----|-----|-----|-----|-----|-----|-----|-----|-----|-----|-----|-----|-----|-----|-----|-----|-----|-----|-----|-----|-----|-----|-----|-----|
| Relevé (n°)                                                                                                                                                        | 60  | 61  | 62  | 63  | 64  | 65  | 66  | 67  | 68  | 69  | 70  | 71  | 72  | 73  | 74  | 75  | 76  | 77  | 78  | 79  | 80  | 81  | 82  | 83  | 84  | 85  | 86  | 87  |
| Altitude (m)                                                                                                                                                       | 66  | 63  | 60  | 67  | 65  | 160 | 250 | 200 | 70  | 70  | 150 | 160 | 250 | 135 | 80  | 78  | 79  | 70  | 76  | 81  | 81  | 74  | 86  | 84  | 80  | 80  | 65  | 67  |
| Slope(°)                                                                                                                                                           | 30  | 25  | 30  | 20  | 20  | 8   | 3   | 3   | 5   | 10  | 40  | 30  | 70  | 50  | 15  | 15  | 5   | 30  | 20  | 5   | 5   | 7   | 15  | 15  | 20  | 30  | 25  | 25  |
| Aspect                                                                                                                                                             | E   | W   | E   | E   | E   | SE  | S   | S   | N   | W   | SW  | S   | SE  | SW  | N   | E   | E   | E   | E   | E   | E   | N   | E   | S   | SW  | S   | S   | SE  |
| Area (m2)                                                                                                                                                          | 100 | 100 | 100 | 100 | 100 | 150 | 100 | 100 | 150 | 150 | 150 | 150 | 70  | 150 | 150 | 100 | 100 | 100 | 100 | 100 | 100 | 100 | 150 | 150 | 120 | 150 | 100 | 100 |
| Total cover (%)                                                                                                                                                    | 100 | 100 | 100 | 100 | 100 | 100 | 90  | 100 | 100 | 100 | 100 | 90  | 100 | 100 | 95  | 100 | 100 | 100 | 100 | 100 | 100 | 100 | 100 | 95  | 100 | 100 | 100 | 90  |
| Three cover (%)                                                                                                                                                    | 100 | 100 | 95  | 100 | 100 | 100 | 80  | 100 | 100 | 100 | 100 | 100 | 30  | 100 | 90  | 100 | 95  | 100 | 100 | 100 | 100 | 40  | 100 | 90  | 100 | 100 | 100 | 20  |
| Woody cover (%)                                                                                                                                                    | 100 | 100 | 95  | 100 | 100 | 100 | 80  | 100 | 100 | 100 | 100 | 100 | 100 | 100 | 90  | 100 | 95  | 100 | 100 | 100 | 100 | 70  | 100 | 90  | 100 | 100 | 100 | 80  |
| Herbaceous cover (%)                                                                                                                                               | 20  | 20  | 30  | 25  | 30  | 80  | 30  | 80  | 30  | 25  | 30  | 35  | 45  | 30  | 40  | 30  | 25  | 40  | 40  | 20  | 20  | 15  | 40  | 40  | 40  | 40  | 20  | 30  |
| Average heigth of the dominant layer (m)                                                                                                                           | 5   | 5,5 | 4   | 6   | 6   | 4   | 4   | 6,5 | 4   | 4,5 | 5   | 6   | 3   | 5,5 | 4   | 6   | 6   | 7   | 5   | 5   | 5   | 7   | 5   | 3,5 | 6   | 6   | 5   | 3,5 |
| Species per relevé                                                                                                                                                 | 15  | 17  | 13  | 15  | 15  | 26  | 20  | 20  | 16  | 19  | 20  | 17  | 23  | 20  | 16  | 16  | 18  | 20  | 19  | 22  | 21  | 19  | 18  | 19  | 17  | 16  | 21  | 21  |
| <b>Char. and diff. of association and subassociation</b>                                                                                                           |     |     |     |     |     |     |     |     |     |     |     |     |     |     |     |     |     |     |     |     |     |     |     |     |     |     |     |     |
| <i>Olea europaea</i> L. var. <i>sylvestris</i> (Mill.) Lehr                                                                                                        | 5   | 5   | 5   | 5   | 5   | 5   | 5   | 5   | 5   | 5   | 5   | 5   | 5   | 5   | 4   | 5   | 5   | 5   | 5   | 4   | 5   | 5   | 4   | 5   | 5   | 5   | 5   | 5   |
| <i>Acanthus mollis</i> L. subsp. <i>mollis</i>                                                                                                                     | 1   | 2   | 2   | 2   | 2   | 1   | 1   | 4   | 1   | 1   | 3   | 1   | 1   | +   | +   | 1   | 1   | 3   | 3   | +   | +   | 1   | 2   | 1   | 2   | 3   | 2   | 1   |
| <i>Chamaerops humilis</i> L.                                                                                                                                       | .   | 1   | 1   | 1   | 1   | 2   | 2   | 1   | 2   | 2   | +   | 1   | +   | 2   | 1   | .   | .   | 1   | 1   | +   | 1   | +   | 1   | 1   | +   | 1   | 1   | 1   |
| <i>Rhamnus alaternus</i> L. subsp. <i>alaternus</i>                                                                                                                | 3   | 3   | 3   | 3   | 3   | 2   | 2   | 1   | .   | .   | +   | .   | .   | .   | +   | +   | 1   | .   | .   | 2   | 2   | .   | 1   | .   | .   | .   | 1   | .   |
| <b>Char. of alliance and order</b>                                                                                                                                 |     |     |     |     |     |     |     |     |     |     |     |     |     |     |     |     |     |     |     |     |     |     |     |     |     |     |     |     |
| <i>Pistacia lentiscus</i> L.                                                                                                                                       | .   | .   | .   | .   | .   | 2   | 1   | 2   | 3   | 2   | 2   | 1   | 3   | 2   | 3   | 3   | 3   | 3   | 3   | 3   | 2   | 4   | 3   | 3   | 2   | 2   | 2   | 2   |
| <i>Allium subhirsutum</i> L. subsp. <i>subhirsutum</i>                                                                                                             | .   | .   | .   | 1   | +   | 1   | 1   | +   | 2   | 2   | 1   | +   | 1   | +   | .   | +   | +   | 1   | 1   | +   | +   | .   | 1   | 1   | 1   | 1   | +   | 1   |
| <i>Stachys major</i> (L.) Bartolucci & Peruzzi                                                                                                                     | .   | .   | .   | .   | .   | +   | 1   | 2   | 2   | 1   | +   | +   | +   | .   | 2   | .   | 1   | +   | 1   | 1   | .   | 1   | 1   | 1   | +   | +   | 1   | 1   |
| <i>Asparagus albus</i> L.                                                                                                                                          | +   | 1   | .   | +   | 1   | 1   | 1   | 1   | .   | .   | 2   | 2   | 2   | 2   | 1   | .   | .   | .   | .   | .   | .   | .   | +   | .   | 1   | 1   | 1   | 1   |
| <i>Teucrium fruticans</i> L. subsp. <i>fruticans</i>                                                                                                               | 1   | 2   | 2   | 3   | 2   | .   | .   | .   | 1   | 1   | 1   | 2   | 1   | 2   | 2   | .   | 2   | .   | .   | .   | .   | .   | .   | 1   | .   | .   | .   | .   |
| <i>Anagyris foetida</i> L.                                                                                                                                         | .   | .   | .   | .   | .   | .   | +   | .   | .   | .   | 1   | 1   | +   | .   | .   | .   | .   | .   | 2   | 2   | 1   | 1   | 1   | 1   | .   | .   | +   | 2   |
| <i>Clematis cirrhosa</i> L.                                                                                                                                        | .   | .   | .   | .   | .   | 1   | .   | .   | .   | .   | .   | .   | .   | .   | +   | +   | .   | +   | .   | +   | .   | .   | 1   | +   | 2   | 1   | .   | .   |
| <i>Calicotome infesta</i> (C.Presl) Guss. subsp. <i>infesta</i>                                                                                                    | .   | .   | .   | .   | .   | .   | .   | .   | .   | .   | .   | .   | 1   | .   | .   | .   | 1   | .   | +   | .   | +   | 1   | 1   | .   | .   | .   | .   | 1   |
| <i>Rhamnus lycioides</i> subsp. <i>oleoides</i> (L.) Jahand. & Maire                                                                                               | .   | .   | .   | .   | .   | 2   | 1   | 1   | 2   | 3   | .   | .   | .   | .   | .   | .   | .   | .   | .   | .   | .   | 1   | .   | .   | .   | .   | .   | .   |
| <i>Artemisia arborescens</i> (Vaill.) L.                                                                                                                           | .   | .   | .   | .   | .   | 2   | 1   | 1   | .   | .   | .   | .   | 1   | 2   | .   | .   | .   | .   | .   | .   | .   | .   | .   | .   | .   | .   | .   | .   |
| <i>Euphorbia dendroides</i> L.                                                                                                                                     | .   | 1   | 1   | .   | .   | .   | .   | .   | .   | .   | .   | .   | .   | .   | .   | .   | .   | .   | .   | .   | .   | .   | .   | .   | .   | .   | .   | .   |
| <i>Ceratonia siliqua</i> L.                                                                                                                                        | .   | .   | .   | .   | .   | .   | .   | .   | .   | .   | 2   | .   | .   | .   | .   | .   | .   | .   | .   | 1   | .   | .   | .   | .   | .   | .   | .   | .   |
| <i>Teucrium flavum</i> L. subsp. <i>flavum</i>                                                                                                                     | .   | .   | .   | .   | .   | 1   | .   | .   | .   | .   | .   | .   | .   | .   | .   | .   | .   | .   | .   | .   | .   | .   | .   | .   | .   | .   | .   | .   |
| <i>Myrtus communis</i> L.                                                                                                                                          | .   | .   | .   | .   | .   | .   | .   | .   | .   | .   | .   | .   | .   | .   | .   | .   | .   | .   | .   | .   | .   | .   | 1   | .   | .   | .   | .   | .   |
| <b>Char. of class</b>                                                                                                                                              |     |     |     |     |     |     |     |     |     |     |     |     |     |     |     |     |     |     |     |     |     |     |     |     |     |     |     |     |
| <i>Asparagus acutifolius</i> L.                                                                                                                                    | 1   | 1   | 1   | +   | 1   | 1   | .   | 1   | 2   | 1   | +   | 1   | +   | 1   | +   | 1   | 1   | 1   | 1   | 4   | 1   | +   | 1   | 1   | 1   | 1   | 1   | 1   |
| <i>Arisarum vulgare</i> O.Targ.Tozz. subsp. <i>vulgare</i>                                                                                                         | .   | .   | .   | +   | 1   | 1   | 1   | +   | 2   | 2   | 1   | 1   | 1   | 1   | +   | 1   | +   | .   | 1   | +   | +   | 1   | 1   | 1   | +   | 1   | +   | +   |
| <i>Rubia peregrina</i> L.                                                                                                                                          | +   | 1   | .   | 2   | 1   | .   | 1   | +   | .   | .   | .   | +   | +   | .   | 1   | 1   | 1   | +   | .   | 1   | 1   | 1   | 1   | 1   | 1   | 1   | 1   | 1   |
| <i>Smilax aspera</i> L.                                                                                                                                            | 1   | 1   | +   | 1   | .   | 2   | .   | .   | .   | .   | .   | .   | .   | 1   | 1   | 1   | 1   | 3   | 3   | 2   | 3   | 1   | 3   | +   | 2   | 2   | 2   | +   |
| <i>Ampelodesmos mauritanicus</i> (Poir.) T.Durand & Schinz                                                                                                         | .   | 1   | +   | 1   | 1   | 2   | .   | 1   | 1   | 1   | .   | .   | 1   | +   | .   | .   | .   | 1   | +   | .   | +   | .   | +   | 1   | .   | .   | .   | +   |
| <i>Osyris alba</i> L.                                                                                                                                              | 1   | 2   | +   | .   | .   | 1   | .   | .   | .   | .   | +   | +   | .   | +   | .   | +   | .   | .   | .   | .   | .   | +   | .   | .   | .   | .   | .   | .   |
| <i>Daphne gnidium</i> L.                                                                                                                                           | .   | .   | .   | .   | .   | .   | .   | .   | .   | +   | .   | .   | .   | .   | +   | .   | .   | +   | .   | +   | +   | +   | 1   | .   | +   | .   | .   | .   |







|                                                         |   |   |   |   |   |   |   |   |   |   |   |   |   |   |   |   |
|---------------------------------------------------------|---|---|---|---|---|---|---|---|---|---|---|---|---|---|---|---|
| <i>Quercus suber</i> L.                                 | . | . | 1 | 1 | . | + | . | . | . | . | . | . | . | . | . | . |
| <i>Daphne gnidium</i> L.                                | . | . | + | 1 | . | . | . | . | . | + | . | . | . | . | . | . |
| <i>Euphorbia characias</i> L.                           | . | . | . | . | 1 | 1 | . | . | . | . | . | . | . | . | . | . |
| <i>Pyrus spinosa</i> Forssk.                            | . | . | . | . | 1 | . | . | . | . | . | . | . | . | . | . | . |
| <i>Osyris alba</i> L.                                   | . | . | . | . | . | . | . | . | + | . | . | . | . | . | . | . |
| <b>Other species</b>                                    |   |   |   |   |   |   |   |   |   |   |   |   |   |   |   |   |
| <i>Hyparrhenia hirta</i> (L.) Stapf subsp. <i>hirta</i> | 1 | 1 | + | + | . | 1 | . | 1 | 1 | . | 2 | . | 1 | 1 | 1 | 2 |
| <i>Charybdis pancration</i> (Steinh.) Speta             | . | . | + | + | 1 | + | 1 | 2 | 1 | + | . | . | + | . | 1 | + |
| <i>Asphodelus ramosus</i> L. subsp. <i>ramosus</i>      | . | . | . | . | . | . | . | . | . | . | + | 1 | 1 | 1 | 2 | 1 |
| <i>Oloptum miliaceum</i> (L.) Röser & H.R.Hamasha       | . | . | . | . | . | + | . | . | . | . | . | . | . | . | . | . |
| <i>Oxalis pes-caprae</i> L.                             | 2 | 1 | . | . | . | . | 3 | 2 | 2 | 3 | 3 | 2 | 2 | 2 | 2 | 2 |
| <i>Bituminaria bituminosa</i> (L.) E.H.Stirt.           | . | . | . | . | . | . | + | + | 1 | + | 1 | + | . | . | . | . |
| <i>Brachypodium retusum</i> (Pers.) P.Beauv.            | + | . | . | . | . | . | 1 | + | . | . | . | . | . | . | . | . |
| <i>Cistus salvifolius</i> L.                            | . | . | . | . | . | . | 2 | + | 2 | . | . | . | . | . | . | . |
| <i>Carlina sicula</i> Ten. subsp. <i>sicula</i>         | . | . | . | . | . | . | . | . | . | . | + | . | . | . | 1 | + |
| <i>Cistus monspeliensis</i> L.                          | . | . | . | . | . | . | . | . | . | . | . | 1 | . | . | + | . |
| <i>Helianthemum lippii</i> (L.) Dum.Cours.              | . | . | . | . | . | . | . | . | . | . | . | . | + | + | . | . |
| <i>Smyrniololus olusatrum</i> L.                        | . | . | . | . | . | 3 | . | . | . | . | . | . | . | . | . | . |
| <i>Capparis spinosa</i> L.                              | . | . | . | . | . | . | . | . | . | + | . | . | . | . | . | . |

**Table S6.** Phytosociological table of *Calicotomo infestae-Oleetum sylvestris* subass. *typicum* (rel. 104-115) and subass. *asplenietosum obovatae* (rel. 116-120).

|                                          |     |     |     |     |      |     |     |     |     |     |     |     |     |     |     |     |     |
|------------------------------------------|-----|-----|-----|-----|------|-----|-----|-----|-----|-----|-----|-----|-----|-----|-----|-----|-----|
| Relevé (n°)                              | 104 | 105 | 106 | 107 | 108  | 109 | 110 | 111 | 112 | 113 | 114 | 115 | 116 | 117 | 118 | 119 | 120 |
| Altitude (m)                             | 300 | 320 | 465 | 467 | 540  | 400 | 420 | 300 | 250 | 180 | 300 | 500 | 160 | 335 | 320 | 250 | 250 |
| Slope(°)                                 | 35  | 35  | 40  | 25  | 25   | 35  | 30  | 40  | 5   | 25  | 30  | 40  | 40  | 40  | 35  | 68  | 75  |
| Aspect                                   | S   | S   | SO  | SE  | S_SE | S   | SW  | E   | SW  | SE  | E   | E   | W   | SW  | NE  | SE  | S   |
| Area (m2)                                | 100 | 100 | 90  | 80  | 85   | 150 | 100 | 100 | 100 | 100 | 100 | 100 | 100 | 100 | 80  | 100 | 100 |
| Total cover (%)                          | 100 | 100 | 85  | 100 | 90   | 100 | 100 | 100 | 100 | 100 | 110 | 100 | 100 | 110 | 100 | 100 | 100 |
| Three cover (%)                          | 100 | 40  | 80  | 90  | 60   | 80  | 90  | 100 | 100 | 100 | 90  | 100 | 100 | 90  | 100 | 100 | 75  |
| Woody cover (%)                          | 100 | 80  | 80  | 90  | 70   | 100 | 90  | 100 | 100 | 100 | 100 | 100 | 100 | 100 | 100 | 100 | 80  |
| Herbaceous cover (%)                     | 30  | 30  | 50  | 40  | 60   | 25  | 30  | 20  | 40  | 10  | 50  | 40  | 40  | 50  | 40  | 40  | 30  |
| Average height of the dominant layer (m) | 5   | 3,3 | 4   | 4,5 | 3    | 4   | 7   | 2   | 4   | 6,5 | 3,8 | 4   | 5,5 | 3,5 | 3,8 | 6   | 5,5 |
| Species per relevé                       | 25  | 23  | 19  | 24  | 20   | 22  | 18  | 23  | 25  | 22  | 20  | 19  | 23  | 22  | 20  | 22  | 22  |

**Char. and diff. of association and subassociation *typicum****Olea europaea* L. var. *sylvestris* (Mill.) Lehr*Rosa sempervirens* L.*Calicotome infesta* (C.Presl) Guss. subsp. *infesta**Rubus ulmifolius* Schott*Pyrus spinosa* Forssk.*Cistus salvifolius* L.*Erica arborea* L.*Pulicaria odora* (L.) Rchb.*Quercus suber* L.*Cistus monspeliensis* L.

|   |   |   |   |   |   |   |   |   |   |   |   |   |   |   |   |   |   |
|---|---|---|---|---|---|---|---|---|---|---|---|---|---|---|---|---|---|
| 5 | 4 | 4 | 5 | 4 | 5 | 5 | 5 | 5 | 5 | 5 | 5 | 4 | 5 | 5 | 5 | 5 | 5 |
| + | 1 | + | 1 | 1 | 2 | 2 | 2 | 1 | 1 | . | . | 2 | 1 | + | . | + | + |
| 1 | 2 | + | 1 | 1 | + | + | 1 | + | 1 | 1 | 1 | 1 | 2 | 1 | 2 | 1 | 2 |
| 1 | . | . | . | 1 | 1 | 1 | + | 1 | + | 1 | 1 | 1 | 2 | 1 | + | + | . |
| . | . | . | . | . | 2 | 2 | + | + | . | 1 | . | . | . | 1 | 1 | 1 | 2 |
| + | 1 | 2 | 1 | . | . | . | . | + | 1 | . | . | . | 1 | + | + | + | . |
| . | 2 | . | . | . | 1 | + | 1 | 1 | 1 | . | . | . | 1 | . | . | . | + |
| . | + | . | . | . | + | + | + | + | + | . | . | . | . | . | . | . | . |
| . | . | 1 | 1 | 1 | . | . | . | 1 | 1 | . | . | . | . | . | . | . | . |
| . | . | . | . | + | . | . | . | . | . | . | . | . | . | . | . | . | . |

**Diff. of subassociation *asplenietosum obovatae****Asplenium obovatum* Viv. subsp. *obovatum**Carlina hispanica* Lam. subsp. *globosa* (Arcang.) Meusel & Kästner*Selaginella denticulata* Spring

|   |   |   |   |   |   |   |   |   |   |   |   |   |   |   |   |   |   |
|---|---|---|---|---|---|---|---|---|---|---|---|---|---|---|---|---|---|
| . | . | . | . | . | . | . | . | . | . | . | . | . | 1 | + | + | 2 | 1 |
| . | . | . | . | . | . | . | . | . | . | . | . | . | 1 | 1 | 1 | . | + |
| . | . | . | . | . | . | . | . | . | . | . | . | . | 1 | . | 1 | + | + |

**Char. and diff. of alliance and order***Pistacia lentiscus* L.*Artemisia arborescens* (Vaill.) L.*Allium subhirsutum* L. subsp. *subhirsutum**Clematis cirrhosa* L.*Asparagus albus* L.*Teucrium fruticans* L. subsp. *fruticans**Stachys major* (L.) Bartolucci & Peruzzi*Anagyris foetida* L.*Chamaerops humilis* L.*Ceratonia siliqua* L.

|   |   |   |   |   |   |   |   |   |   |   |   |   |   |   |   |   |   |
|---|---|---|---|---|---|---|---|---|---|---|---|---|---|---|---|---|---|
| . | 2 | 2 | 1 | 1 | 1 | 1 | 4 | 3 | 3 | . | . | 1 | 1 | . | + | + | + |
| 1 | + | . | + | . | . | . | . | . | 1 | 2 | 3 | . | 1 | + | + | + | 1 |
| + | 1 | . | + | 1 | . | . | . | . | . | . | . | . | + | 2 | + | + | + |
| . | . | . | . | + | 1 | 1 | 1 | + | 2 | 1 | . | . | . | . | . | . | . |
| 3 | 1 | 1 | 1 | 1 | . | . | . | . | . | . | + | . | . | . | . | . | . |
| + | 2 | . | . | . | . | . | 2 | 1 | 1 | . | . | . | . | . | . | . | . |
| 1 | + | + | . | . | . | . | . | . | . | . | . | . | . | . | . | . | . |
| . | . | . | . | . | . | . | 1 | . | . | 2 | 1 | . | . | . | . | . | . |
| 3 | 2 | . | . | . | . | . | . | . | . | . | . | . | . | . | . | . | . |
| 1 | . | . | . | . | . | . | . | . | . | . | . | . | . | . | . | . | . |

**Char. of class***Smilax aspera* L.

|   |   |   |   |   |   |   |   |   |   |   |   |   |   |   |   |   |   |
|---|---|---|---|---|---|---|---|---|---|---|---|---|---|---|---|---|---|
| . | + | + | 2 | 3 | 3 | 3 | 3 | 1 | 2 | 1 | 1 | 2 | + | 2 | 2 | 2 | 1 |
|---|---|---|---|---|---|---|---|---|---|---|---|---|---|---|---|---|---|

|                                                                                       |   |   |   |   |   |   |   |   |   |   |   |   |   |   |   |   |   |
|---------------------------------------------------------------------------------------|---|---|---|---|---|---|---|---|---|---|---|---|---|---|---|---|---|
| <i>Arisarum vulgare</i> O.Targ.Tozz. subsp. <i>vulgare</i>                            | 1 | 1 | 1 | + | + | 2 | 2 | + | . | 1 | 1 | 1 | 1 | 1 | + | 1 | 1 |
| <i>Asparagus acutifolius</i> L.                                                       | 1 | + | + | 1 | . | 1 | . | 1 | 2 | 1 | 1 | 1 | 1 | 1 | 1 | 2 | 2 |
| <i>Rubia peregrina</i> L.                                                             | 2 | + | + | 1 | 2 | + | 1 | 1 | 1 | + | . | . | 2 | 1 | . | + | . |
| <i>Ampelodesmos mauritanicus</i> (Poir.) T.Durand & Schinz                            | 2 | 2 | . | . | 1 | 1 | 1 | 2 | + | 1 | . | . | 1 | . | . | . | 1 |
| <i>Rhamnus alaternus</i> L. subsp. <i>alaternus</i>                                   | . | . | . | . | . | 1 | . | . | + | 1 | . | . | 2 | 2 | + | 1 | 1 |
| <i>Euphorbia characias</i> L.                                                         | + | . | 1 | 1 | . | 1 | . | . | + | . | 1 | + | . | . | . | . | . |
| <i>Phillyrea latifolia</i> L.                                                         | . | 3 | + | 1 | . | 2 | 1 | 1 | 1 | . | . | . | . | . | . | . | . |
| <i>Ruscus aculeatus</i> L.                                                            | . | . | . | + | . | 3 | 2 | 1 | + | . | + | . | 1 | . | . | . | . |
| <i>Daphne gnidium</i> L.                                                              | + | . | 1 | 1 | 1 | . | . | . | + | . | . | . | . | . | . | . | . |
| <i>Cyclamen hederifolium</i> Aiton subsp. <i>hederifolium</i>                         | . | . | + | + | . | . | + | . | . | . | . | + | . | . | . | . | . |
| <i>Ulmus minor</i> Mill.                                                              | . | . | . | 1 | . | 1 | . | . | . | . | 1 | . | . | . | . | . | . |
| <i>Tamus communis</i> L.                                                              | . | . | . | . | + | . | . | . | . | . | + | . | . | . | . | . | . |
| <i>Clematis vitalba</i> L.                                                            | . | . | . | . | . | . | . | . | . | . | . | 1 | . | 1 | . | . | + |
| <i>Asplenium trichomanes</i> L. subsp. <i>trichomanes</i>                             | . | . | . | . | . | . | . | . | . | . | . | . | + | . | . | 1 | 1 |
| <i>Asplenium onopteris</i> L.                                                         | . | . | . | . | . | . | . | . | . | . | . | . | . | . | 1 | 1 | 1 |
| <i>Lonicera implexa</i> Aiton subsp. <i>implexa</i>                                   | + | . | . | 1 | . | . | . | . | . | . | . | . | . | . | . | . | . |
| <i>Cyclamen repandum</i> Sm. subsp. <i>repandum</i>                                   | . | . | . | . | . | 1 | . | + | . | . | . | . | . | . | . | . | . |
| <i>Carex distachya</i> Desf.                                                          | . | . | . | . | . | . | . | . | 1 | + | . | . | . | . | . | . | . |
| <i>Osyris alba</i> L.                                                                 | . | . | . | . | . | . | . | . | . | . | 2 | 1 | . | . | . | . | . |
| <i>Quercus virgiliana</i> Ten.                                                        | . | . | . | . | . | . | . | . | . | . | . | . | 1 | . | . | 1 | . |
| <i>Hedera helix</i> L. subsp. <i>helix</i>                                            | . | . | . | + | . | . | . | . | . | . | + | . | . | . | . | . | . |
| <i>Fraxinus ornus</i> L. subsp. <i>ornus</i>                                          | . | . | . | . | . | 1 | . | . | . | . | . | . | . | . | . | . | . |
| <i>Emerus major</i> Mill. subsp. <i>major</i>                                         | . | . | . | . | . | . | . | 1 | . | . | . | . | . | . | . | . | . |
| <i>Celtis australis</i> L. subsp. <i>australis</i>                                    | . | . | . | . | . | . | . | . | . | . | . | . | 1 | . | . | . | . |
| <b>Other species</b>                                                                  |   |   |   |   |   |   |   |   |   |   |   |   |   |   |   |   |   |
| <i>Acanthus mollis</i> L. subsp. <i>mollis</i>                                        | . | . | . | . | + | 1 | 1 | 1 | + | + | + | + | 3 | 3 | . | . | . |
| <i>Brachypodium retusum</i> (Pers.) P.Beauv.                                          | 1 | 2 | 2 | 3 | . | . | . | . | 2 | + | . | . | . | . | . | . | . |
| <i>Charybdis pancrati</i> (Steinh.) Speta                                             | + | . | . | 1 | . | . | . | . | . | . | . | . | . | 1 | 1 | + | + |
| <i>Bituminaria bituminosa</i> (L.) E.H.Stirt.                                         | . | . | . | . | . | . | . | + | . | . | . | . | . | 1 | + | + | 1 |
| <i>Hyparrhenia hirta</i> (L.) Stapf subsp. <i>hirta</i>                               | 1 | . | . | . | 1 | . | . | . | . | 1 | . | . | . | . | 1 | . | . |
| <i>Oloptum miliaceum</i> (L.) Röser & H.R.Hamasha                                     | 1 | . | . | . | . | . | + | + | 1 | . | . | . | . | . | . | . | . |
| <i>Phagnalon saxatile</i> (L.) Cass.                                                  | + | . | . | . | . | . | . | . | . | . | . | 1 | 1 | 2 | . | . | . |
| <i>Dactylis glomerata</i> subsp. <i>hispanica</i> (Roth) Nyman                        | . | . | . | . | . | . | . | . | . | . | . | . | . | 1 | + | 1 | 1 |
| <i>Umbilicus horizontalis</i> (Guss.) DC.                                             | . | . | . | . | + | . | . | . | . | . | + | + | . | . | . | . | . |
| <i>Oxalis pes-caprae</i> L.                                                           | 2 | 1 | . | . | . | . | . | . | . | . | . | . | . | . | . | . | . |
| <i>Asphodelus ramosus</i> L. subsp. <i>ramosus</i>                                    | . | + | + | . | . | . | . | . | . | . | . | . | . | . | . | . | . |
| <i>Carlina sicula</i> Ten. subsp. <i>sicula</i>                                       | . | . | + | + | . | . | . | . | . | . | . | . | . | . | . | . | . |
| <i>Celtis tournefortii</i> Lam. subsp. <i>aetnensis</i> (Tornab.) Raimondo & Schicchi | . | . | . | . | . | . | . | . | . | . | 1 | 2 | . | . | . | . | . |
| <i>Foeniculum vulgare</i> Mill. subsp. <i>vulgare</i>                                 | . | . | . | . | . | . | . | . | . | . | + | 1 | . | . | . | . | . |
| <i>Mercurialis annua</i> L.                                                           | . | . | . | . | . | . | . | . | . | . | . | . | 1 | . | . | + | . |
| <i>Cistus creticus</i> subsp. <i>eriocephalus</i> (Viv.) Greuter & Burdet             | . | . | . | . | + | . | . | . | . | . | . | . | . | . | . | . | . |
| <i>Cytisus villosus</i> Pourr.                                                        | . | + | . | . | . | . | . | . | . | . | . | . | . | . | . | . | . |
